# Supplementary material for: Host alarm calls attract the unwanted attention of the brood parasitic common cuckoo
Source: PubMed Central journal article supplement (PMC6898711; doi:10.1038/s41598-019-54909-1), 2019-12-06
Supplement: 41598_2019_54909_MOESM3_ESM.pdf [file 41598_2019_54909_MOESM3_ESM.pdf]

# Host alarm calls attract the unwanted attention of the brood parasitic common cuckoo

*Attila Marton, Attila FÁLLIÁp, Katalin OzogÁny, Csaba MoskÁt and MiklÁts BÁn*

*14 November 2019*

Files from the Supplementary Material needed to run the code:

## 1. Correlative-study-data.csv

- nestid: a concatenated id showing the number of given nest in given year and the year
- site: name of channel (Arapaszto, Apaj, DVCS)
- parasite: presence of parasitism, 1 if cc.eggs > 1
- p.risk: risk of parasitism, “high” in the first 3 days of laying, “low” in the second 3 days of laying
- b.pair: binomial variable of presence/absence of alarming at nest visits
- observer: initials of observers
- s.mminutes: mminutes Z-transformed to mean = 0 and SD = 1

## 2. Experiment1-data.csv

- date: format yyyy.mm.dd
- time: format hh:mm
- before.ccm: male common cuckoo activity near the focal great reed warbler nest 2 minutes prior to alarm call (0 = none, 1 = calling, 2 = flying closer, 3 = flying closer and vocalizing intensively)
- during.ccm: male common cuckoo activity near the focal great reed warbler nest during 2 minutes of alarm call (0 = none, 1 = calling, 2 = flying closer, 3 = flying closer and vocalizing intensively)
- before.ccf: female common cuckoo activity near the focal great reed warbler nest 2 minutes prior to alarm call (0 = none, 1 = calling, 2 = flying closer, 3 = flying closer and vocalizing intensively)
- during.ccf: female common cuckoo activity near the focal great reed warbler nest during 2 minutes of alarm call (0 = none, 1 = calling, 2 = flying closer, 3 = flying closer and vocalizing intensively)
- observer: initials of observers

## 3. Drone-study-data.csv

- nestid: a concatenated id showing the number of given nest in given year and the year
- id: the id number of given nest within given year
- year: the year of the study
- date: format yyyy.mm.dd
- parasite: presence of parasitism, 1 if cc.eggs > 1
- nest.height: the height of the nest from top to bottom in cm
- nest.width: the width of the nest at the top in cm
- dist.water: distance of nest from water in cm
- dist.bank: distance of nest from the bank in cm
- above.water: distance between water and the top of the nest in cm
- above.nest: distance from the top of the nest and the top of the vegetation in cm
- visibility: direct nest view (DNV), indirect nest view (INV), no nest view (NNW) from the nest to the nearest perching tree
- perch.dist: distance in m to the nearest perching tree
- observer: initials of observers

```
#library(Matrix)
#library(lme4)
library(lsmmeans)
#library(car)
#library(exactRankTests)
library("knitr")
```

```
#source: https://github.com/aufrank/R-hacks/blob/master/mer-utils.R

vif.mer <- function (fit) {
  ## adapted from rms::vif

  v <- vcov(fit)
  nam <- names(fixef(fit))

  ## exclude intercepts
  ns <- sum(1 * (nam == "Intercept" | nam == "(Intercept)"))
  if (ns > 0) {
    v <- v[-(1:ns), -(1:ns), drop = FALSE]
    nam <- nam[-(1:ns)]
  }
}
```

```

}

d <- diag(v)^0.5
v <- diag(solve(v/(d %o% d)))
names(v) <- nam
v
}

```

```

r0 = "#FFFFFF"
r1 = "#FD9A28"
r2 = "#FF5126"
r3 = "#d50000"

```

```

df <- read.csv("Correlative-study-data.csv", header = T, sep = ";", dec = ".", na.strings = c("NA", "", " "))
summary(df)

```

```

##          nr          nestid      mminutes          site
## Min.   : 1.00  2013_275: 5  Min.   :345.0  Apaj          :117
## 1st Qu.: 83.25  2013_309: 5  1st Qu.:546.2  Arapaszto     : 47
## Median :165.50  2013_311: 5  Median :595.0  DVCS          :131
## Mean   :165.50  2013_313: 5  Mean    :582.5  Kunszentmiklos: 35
## 3rd Qu.:247.75  2013_34 : 5  3rd Qu.:626.5
## Max.   :330.00  2013_39 : 5  Max.    :660.0
##
##          (Other) :300
##      parasite      p.risk      b.pair      observer      s.mminutes
## Min.   :0.0000  high:158  Min.   :0.0000  BM : 83  Min.   :-4.1857
## 1st Qu.:0.0000  low :172  1st Qu.:0.0000  GN :127  1st Qu.:-0.6392
## Median :0.0000          Median :0.0000  MA : 15  Median : 0.2198
## Mean   :0.2485          Mean   :0.1727  ZSI:105  Mean   : 0.0000
## 3rd Qu.:0.0000          3rd Qu.:0.0000          3rd Qu.: 0.7749
## Max.   :1.0000          Max.   :1.0000          Max.   : 1.3653
##
##

```

```

str(df)

```

```
## 'data.frame': 330 obs. of 9 variables:
## $ nr : int 1 2 3 4 5 6 7 8 9 10 ...
## $ nestid : Factor w/ 170 levels "2013_104","2013_106",...: 1 2 2 2 2 3 3 4 4 5 ...
## $ mminutes : int 480 530 600 615 570 545 630 540 540 634 ...
## $ site : Factor w/ 4 levels "Apaj","Arapaszto",...: 1 1 1 1 1 1 1 1 1 1 ...
## $ parasite : int 1 0 0 0 0 0 0 0 0 0 ...
## $ p.risk : Factor w/ 2 levels "high","low": 2 1 1 2 2 1 2 1 2 1 ...
## $ b.pair : int 0 0 0 0 0 0 0 0 0 0 ...
## $ observer : Factor w/ 4 levels "BM","GN","MA",...: 1 1 4 4 4 1 1 1 1 1 ...
## $ s.mminutes: num -1.807 -0.926 0.308 0.572 -0.221 ...
```

```
df$nestid <- as.factor(df$nestid)
df$site <- as.factor(df$site)
df$observer <- as.factor(df$observer)
df$p.risk <- as.factor(df$p.risk)
df$b.pair <- as.factor(df$b.pair)
df$s.mminutes <- scale(df$mminutes)
df$parasite <- as.numeric(df$parasite)

# glmer model

p_b.p <- glmer(parasite ~ b.pair
              + p.risk
              + s.mminutes
              + b.pair:p.risk
              + b.pair:s.mminutes
              + (1|site:nestid)
              + (1|observer)
              ,
              data=df,
              family = "binomial",
              control = glmerControl(optimizer = "bobyqa",
                                     optCtrl = list(maxfun = 500000)),
              na.action = na.omit)
```

```
## singular fit
```

```
summary(p_b.p)
```

```
## Generalized linear mixed model fit by maximum likelihood (Laplace
## Approximation) [glmerMod]
## Family: binomial ( logit )
## Formula:
## parasite ~ b.pair + p.risk + s.mminutes + b.pair:p.risk + b.pair:s.mminutes +
## (1 | site:nestid) + (1 | observer)
## Data: df
## Control:
## glmerControl(optimizer = "bobyqa", optCtrl = list(maxfun = 5e+05))
##
##      AIC      BIC  logLik deviance df.resid
##  245.4   275.8  -114.7   229.4     322
##
## Scaled residuals:
##      Min       1Q   Median       3Q      Max
## -1.20123 -0.00714 -0.00393 -0.00220  2.94854
##
## Random effects:
## Groups      Name      Variance Std.Dev.
## site:nestid (Intercept) 439.7    20.97
## observer    (Intercept)  0.0      0.00
## Number of obs: 330, groups:  site:nestid, 170; observer, 4
##
## Fixed effects:
##              Estimate Std. Error z value Pr(>|z|)
## (Intercept)   -10.7462    1.4751  -7.285 3.21e-13 ***
## b.pair1         3.5434    2.1993   1.611  0.1072
## p.risklow       0.3064    1.2550   0.244  0.8071
## s.mminutes     -1.0257    0.5391  -1.903  0.0571 .
## b.pair1:p.risklow -1.5615    2.4804  -0.630  0.5290
## b.pair1:s.mminutes  1.1510    1.3464   0.855  0.3926
```

```
## ---
## Signif. codes:  0 '***' 0.001 '**' 0.01 '*' 0.05 '.' 0.1 ' ' 1
##
## Correlation of Fixed Effects:
##          (Intr) b.pair1 p.rskl s.mmnt b.pr1:p.
## b.pair1      -0.360
## p.risklow    -0.375  0.215
## s.mminutes   0.240 -0.089  0.270
## b.pr1:p.rsk  0.175 -0.773 -0.497 -0.125
## b.pr1:s.mmn -0.117 -0.268 -0.110 -0.405  0.167
## convergence code: 0
## singular fit
```

```
Anova(p_b.p, type = "III")
```

```
## Error in Anova(p_b.p, type = "III"): could not find function "Anova"
```

```
drop1(p_b.p, test = "Chisq")
```

```
## singular fit
## singular fit
```

```
## Single term deletions
##
## Model:
## parasite ~ b.pair + p.risk + s.mminutes + b.pair:p.risk + b.pair:s.mminutes +
## (1 | site:nestid) + (1 | observer)
##          Df    AIC    LRT Pr(Chi)
## <none>          245.42
## b.pair:p.risk    1 243.82 0.40642  0.5238
## b.pair:s.mminutes 1 244.16 0.74743  0.3873
```

```
p_b.p_2 <- update(p_b.p, .~.  
                - b.pair:p.risk  
                )
```

```
## singular fit
```

```
summary(p_b.p_2)
```

```
## Generalized linear mixed model fit by maximum likelihood (Laplace  
## Approximation) [glmerMod]  
## Family: binomial ( logit )  
## Formula: parasite ~ b.pair + p.risk + s.mminutes + (1 | site:nestid) +  
## (1 | observer) + b.pair:s.mminutes  
## Data: df  
## Control:  
## glmerControl(optimizer = "bobyqa", optCtrl = list(maxfun = 5e+05))  
##  
##      AIC      BIC  logLik deviance df.resid  
##  243.8   270.4  -114.9   229.8     323  
##  
## Scaled residuals:  
##      Min       1Q   Median       3Q      Max  
## -1.20654 -0.00691 -0.00387 -0.00221  2.53906  
##  
## Random effects:  
## Groups      Name      Variance Std.Dev.  
## site:nestid (Intercept) 4.437e+02 2.106e+01  
## observer    (Intercept) 7.526e-14 2.743e-07  
## Number of obs: 330, groups:  site:nestid, 170; observer, 4  
##  
## Fixed effects:  
##              Estimate Std. Error z value Pr(>|z|)  
## (Intercept)   -10.6288    1.4402  -7.380 1.58e-13 ***  
## b.pair1         2.5011     1.4290   1.750  0.0801 .
```

```

## p.risklow          -0.1040      1.0932 -0.095  0.9242
## s.mminutes        -1.0809      0.5473 -1.975  0.0483 *
## b.pair1:s.mminutes  1.3252      1.3080  1.013  0.3110
## ---
## Signif. codes:  0 '***' 0.001 '**' 0.01 '*' 0.05 '.' 0.1 ' ' 1
##
## Correlation of Fixed Effects:
##              (Intr) b.par1 p.rskl s.mmnt
## b.pair1      -0.382
## p.risklow    -0.268 -0.370
## s.mminutes   0.293 -0.329  0.273
## b.pr1:s.mmn -0.170 -0.228 -0.021 -0.401
## convergence code: 0
## singular fit

```

```
drop1(p_b.p_2, test = "Chisq")
```

```

## singular fit
## singular fit

```

```

## Single term deletions
##
## Model:
## parasite ~ b.pair + p.risk + s.mminutes + (1 | site:nestid) +
##          (1 | observer) + b.pair:s.mminutes
##              Df    AIC    LRT Pr(Chi)
## <none>          243.82
## p.risk           1 241.83 0.00893  0.9247
## b.pair:s.mminutes 1 242.93 1.10998  0.2921

```

```

p_b.p_3 <- update(p_b.p_2, .~.
                  - p.risk
                  )

```



```
## singular fit
```

```
summary(p_b.p_3)
```

```
## Generalized linear mixed model fit by maximum likelihood (Laplace
## Approximation) [glmerMod]
## Family: binomial ( logit )
## Formula:
## parasite ~ b.pair + s.mminutes + (1 | site:nestid) + (1 | observer) +
## b.pair:s.mminutes
## Data: df
## Control:
## glmerControl(optimizer = "bobyqa", optCtrl = list(maxfun = 5e+05))
##
##      AIC      BIC  logLik deviance df.resid
##  241.8   264.6  -114.9   229.8     324
##
## Scaled residuals:
##      Min       1Q   Median       3Q      Max
## -1.20321 -0.00697 -0.00391 -0.00219  2.63570
##
## Random effects:
## Groups      Name      Variance Std.Dev.
## site:nestid (Intercept) 443.7    21.06
## observer    (Intercept)  0.0      0.00
## Number of obs: 330, groups:  site:nestid, 170; observer, 4
##
## Fixed effects:
##              Estimate Std. Error z value Pr(>|z|)
## (Intercept)   -10.6679    1.3850  -7.702 1.34e-14 ***
## b.pair1         2.4521    1.3279   1.847  0.0648 .
## s.mminutes     -1.0671    0.5249  -2.033  0.0421 *
## b.pair1:s.mminutes 1.3233    1.3094   1.011  0.3122
## ---
## Signif. codes:  0 '***' 0.001 '**' 0.01 '*' 0.05 '.' 0.1 ' ' 1
```

```
##
## Correlation of Fixed Effects:
##          (Intr) b.pair1 s.mmnt
## b.pair1    -0.536
## s.mminutes  0.393 -0.253
## b.pr1:s.mmn -0.181 -0.258 -0.409
## convergence code: 0
## singular fit
```

```
drop1(p_b.p_3, test = "Chisq")
```

```
## singular fit
```

```
## Single term deletions
##
## Model:
## parasite ~ b.pair + s.mminutes + (1 | site:nestid) + (1 | observer) +
##   b.pair:s.mminutes
##           Df    AIC    LRT Pr(Chi)
## <none>           241.83
## b.pair:s.mminutes  1 240.94 1.1065  0.2929
```

```
p_b.p_4 <- update(p_b.p_3, .~.
                  - b.pair:s.mminutes
                  )
```

```
## singular fit
```

```
summary(p_b.p_4)
```

```
## Generalized linear mixed model fit by maximum likelihood (Laplace
## Approximation) [glmerMod]
```

```

## Family: binomial ( logit )
## Formula:
## parasite ~ b.pair + s.mminutes + (1 | site:nestid) + (1 | observer)
## Data: df
## Control:
## glmerControl(optimizer = "bobyqa", optCtrl = list(maxfun = 5e+05))
##
##      AIC      BIC  logLik deviance df.resid
##  240.9    259.9   -115.5    230.9     325
##
## Scaled residuals:
##      Min       1Q   Median       3Q      Max
## -1.15549 -0.00704 -0.00435 -0.00264  2.42076
##
## Random effects:
## Groups      Name                Variance Std.Dev.
## site:nestid (Intercept) 428.6      20.7
## observer    (Intercept)  0.0        0.0
## Number of obs: 330, groups:  site:nestid, 170; observer, 4
##
## Fixed effects:
##              Estimate Std. Error z value Pr(>|z|)
## (Intercept) -10.5043    1.3429  -7.822  5.2e-15 ***
## b.pair1      2.7488     1.2227   2.248  0.0246 *
## s.mminutes  -0.8621     0.4575  -1.885  0.0595 .
## ---
## Signif. codes:  0 '***' 0.001 '**' 0.01 '*' 0.05 '.' 0.1 ' ' 1
##
## Correlation of Fixed Effects:
##              (Intr) b.pair1
## b.pair1      -0.578
## s.mminutes    0.329 -0.333
## convergence code: 0
## singular fit

```

```
drop1(p_b.p_4, test = "Chisq")
```

```
## singular fit
## singular fit
```

```
## Single term deletions
##
## Model:
## parasite ~ b.pair + s.mminutes + (1 | site:nestid) + (1 | observer)
##           Df    AIC    LRT Pr(Chi)
## <none>      240.94
## b.pair      1 244.59 5.6480 0.01747 *
## s.mminutes  1 242.87 3.9282 0.04748 *
## ---
## Signif. codes:  0 '***' 0.001 '**' 0.01 '*' 0.05 '.' 0.1 ' ' 1
```

```
test(lsmeans(p_b.p_4, ~ b.pair))
```

```
## b.pair    lsmean      SE  df z.ratio p.value
## 0      -10.504271 1.342923 Inf  -7.822 <.0001
## 1       -7.755442 1.183869 Inf  -6.551 <.0001
##
## Results are given on the logit (not the response) scale.
```

```
Anova(p_b.p_4, type = "III")
```

```
## Error in Anova(p_b.p_4, type = "III"): could not find function "Anova"
```

```
vif.mer(p_b.p_4)
```

```
##   b.pair1 s.mminutes
## 1.124561  1.124561
```

```

# plot

predicted.parasite <- predict(p_b.p_2, type = "response")

df.predicted.parasite <- data.frame(x = df$b.pair, y = predicted.parasite)

mean0 <- mean(df.predicted.parasite$y[df.predicted.parasite$x == 0])
mean1 <- mean(df.predicted.parasite$y[df.predicted.parasite$x == 1])

sd0 <- sd(df.predicted.parasite$y[df.predicted.parasite$x == 0])
sd1 <- sd(df.predicted.parasite$y[df.predicted.parasite$x == 1])

se0 <- sd0/sqrt(length(df[df$b.pair == 0,]))
se1 <- sd1/sqrt(length(df[df$b.pair == 1,]))

df.plot <- data.frame(matrix(c(mean0, mean1, 0, 1), nrow = 2, byrow = F, dimnames = list(c(1,2),c("mean", "alarm"
))))

means <- c(mean0, mean1)
names <- c("No alarm", "Alarm")
ses <- c(se0, se1)
plot.top <- max(means + ses*3)

par(mar = c(3,5,1,1))
pred.plot <- barplot(means, names.arg = names, col = c(r1, r3), ylab = "Probability of parasitism (mean  $\hat{\pm}$  SE)",
ylim = c(0, 1), cex.lab=1.8, cex.axis=1.5, cex=1.8)

segments(pred.plot, means-ses, pred.plot, means+ses, lwd=1)

box()

```

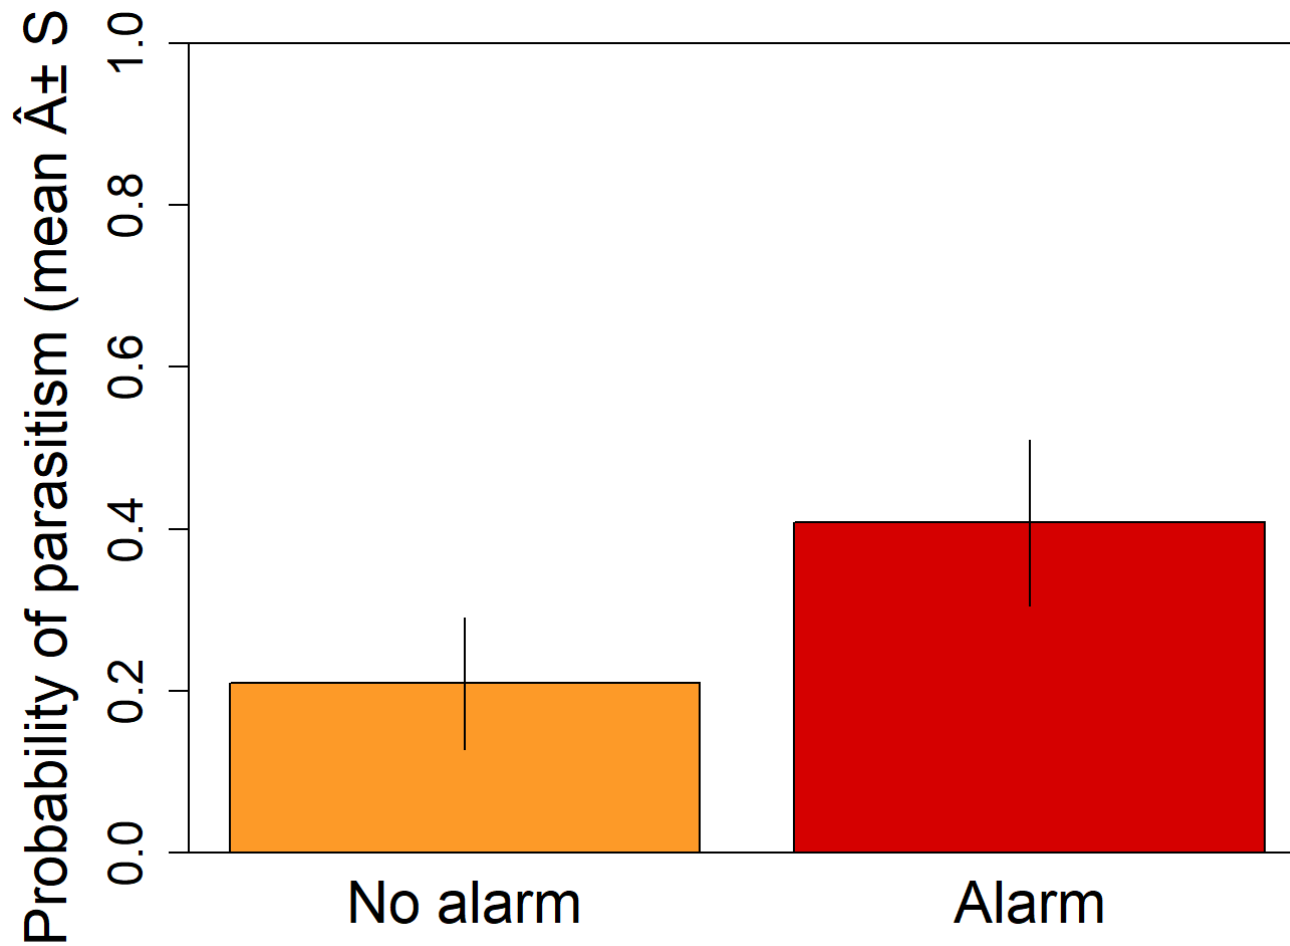

```
df2 <- read.csv("Experiment1-data.csv", header = T, row.names = 1, sep = ";")

df2$before.ccf <- as.numeric(as.character(df2$before.ccf))
df2$during.ccf <- as.numeric(as.character(df2$during.ccf))
df2$before.ccm <- as.numeric(as.character(df2$before.ccm))
df2$during.ccm <- as.numeric(as.character(df2$during.ccm))

table(df2$before.ccf)
```

```
##  
## 0 1 2  
## 45 5 1
```

```
table(df2$during.ccf)
```

```
##  
## 0 1 2 3  
## 41 1 2 7
```

```
table(df2$before.ccm)
```

```
##  
## 0 1 2 3  
## 38 9 3 1
```

```
table(df2$during.ccm)
```

```
##  
## 0 1 2 3  
## 26 8 4 13
```

```
# common cuckoo males
```

```
df2$response.ccm <- df2$before.ccm + df2$during.ccm  
df.plm <- df2[df2$response.ccm > "0",]
```

```
table(df.plm$before.ccm)
```

```
##  
## 0 1 2 3
```

```
## 17 9 3 1
```

```
table(df.plm$during.ccm)
```

```
##  
## 0 1 2 3  
## 5 8 4 13
```

```
male.matrix <- matrix(c(17,5,9,8,3,4,1,13), nrow = 4, byrow = T, dimnames = list(c("0", "1", "2", "3"), c("before",  
"during")))
```

```
fisher.test(t(male.matrix), alternative = "less")
```

```
##  
## Fisher's Exact Test for Count Data  
##  
## data: t(male.matrix)  
## p-value = 0.0002865  
## alternative hypothesis: less
```

```
# common cuckoo females
```

```
df2$response.ccf <- df2$before.ccf + df2$during.ccf  
df.plf <- df2[df2$response.ccf > "0",]
```

```
table(df.plf$before.ccf)
```

```
##  
## 0 1 2  
## 8 5 1
```

```
table(df.plf$during.ccf)
```



```
##  
## 0 1 2 3  
## 4 1 2 7
```

```
female.matrix <-matrix(c(8,4,5,1,1,2,0,7), nrow = 4, byrow = T, dimnames = list(c("0", "1", "2", "3"), c("before",  
"during")))  
  
fisher.test(t(female.matrix), alternative = "less")
```

```
##  
## Fisher's Exact Test for Count Data  
##  
## data:  t(female.matrix)  
## p-value = 0.004043  
## alternative hypothesis: less
```

```
# plot for Experiment 1  
  
par(mar = c(1,1,1,1))  
par(mfrow = c(2,1))  
mosaicplot(female.matrix, main = "Female (n = 14)", sort = 2:1, cex.axis=1.5, col = c(r0, r1, r2, r3))  
mosaicplot(male.matrix, main = "Male (n = 30)", sort = 2:1, cex.axis = 1.4, col = c(r0, r1, r2, r3), xlab = "Res  
ponse intensity")
```

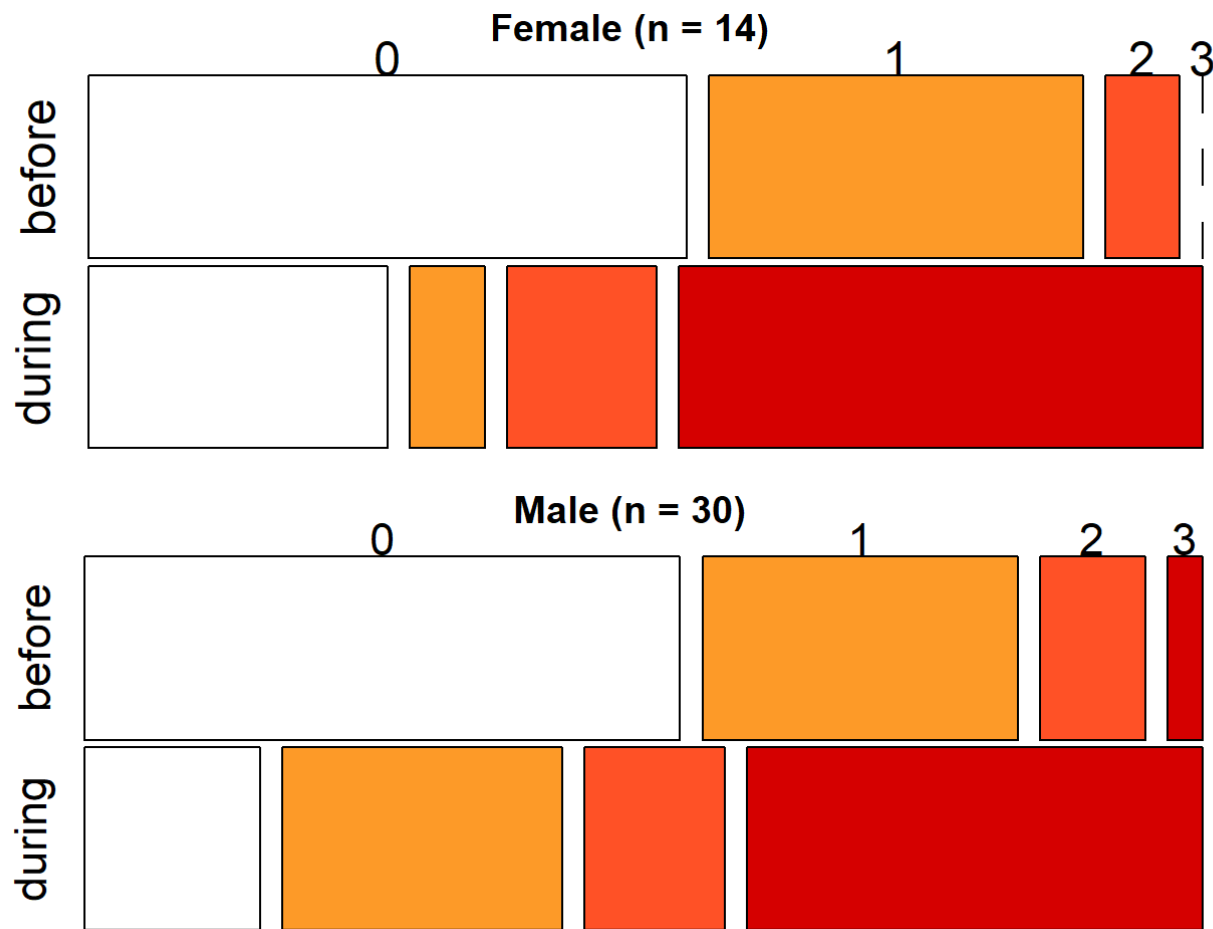

```
# common cuckoo females
```

```
female.matrix2 <- matrix(c(0, 5, 16, 11), nrow = 2, byrow = T, dimnames = list(c("positive", "neutral"), c("control", "experiment")))
```

```
fisher.test(female.matrix2, alternative = "less")
```

```
##
```

```
## Fisher's Exact Test for Count Data
```

```
##
## data: female.matrix2
## p-value = 0.02169
## alternative hypothesis: true odds ratio is less than 1
## 95 percent confidence interval:
## 0.0000000 0.6958781
## sample estimates:
## odds ratio
## 0
```

```
# common cuckoo female, when one weaker response was considered as neutral
female.matrix2b <- matrix(c(0, 4, 16, 11), nrow = 2, byrow = T, dimnames = list(c("positive", "neutral"), c("control", "experiment")))

fisher.test(female.matrix2b, alternative = "less")
```

```
##
## Fisher's Exact Test for Count Data
##
## data: female.matrix2b
## p-value = 0.04338
## alternative hypothesis: true odds ratio is less than 1
## 95 percent confidence interval:
## 0.0000000 0.9325457
## sample estimates:
## odds ratio
## 0
```

```
# common cuckoo males

male.matrix2 <- matrix(c(1, 7, 15, 9), nrow = 2, byrow = T, dimnames = list(c("positive", "neutral"), c("control", "experiment")))

fisher.test(male.matrix2, alternative = "less")
```

```
##  
## Fisher's Exact Test for Count Data  
##  
## data:  male.matrix2  
## p-value = 0.01863  
## alternative hypothesis: true odds ratio is less than 1  
## 95 percent confidence interval:  
##  0.0000000 0.7033189  
## sample estimates:  
## odds ratio  
## 0.09243924
```

```
# plot for Experiment 2
```

```
par(mar = c(1,1,1,1))  
par(mfrow = c(1,2))
```

```
mosaicplot(female.matrix2, col = c(r3, r1), main = "Female (n = 32)", sort = 2:1, cex.axis = 1.8, off = 5)  
mosaicplot(male.matrix2, col = c(r3, r1), main = "Male (n = 32)", sort = 2:1, cex.axis = 1.8, off = 5)
```

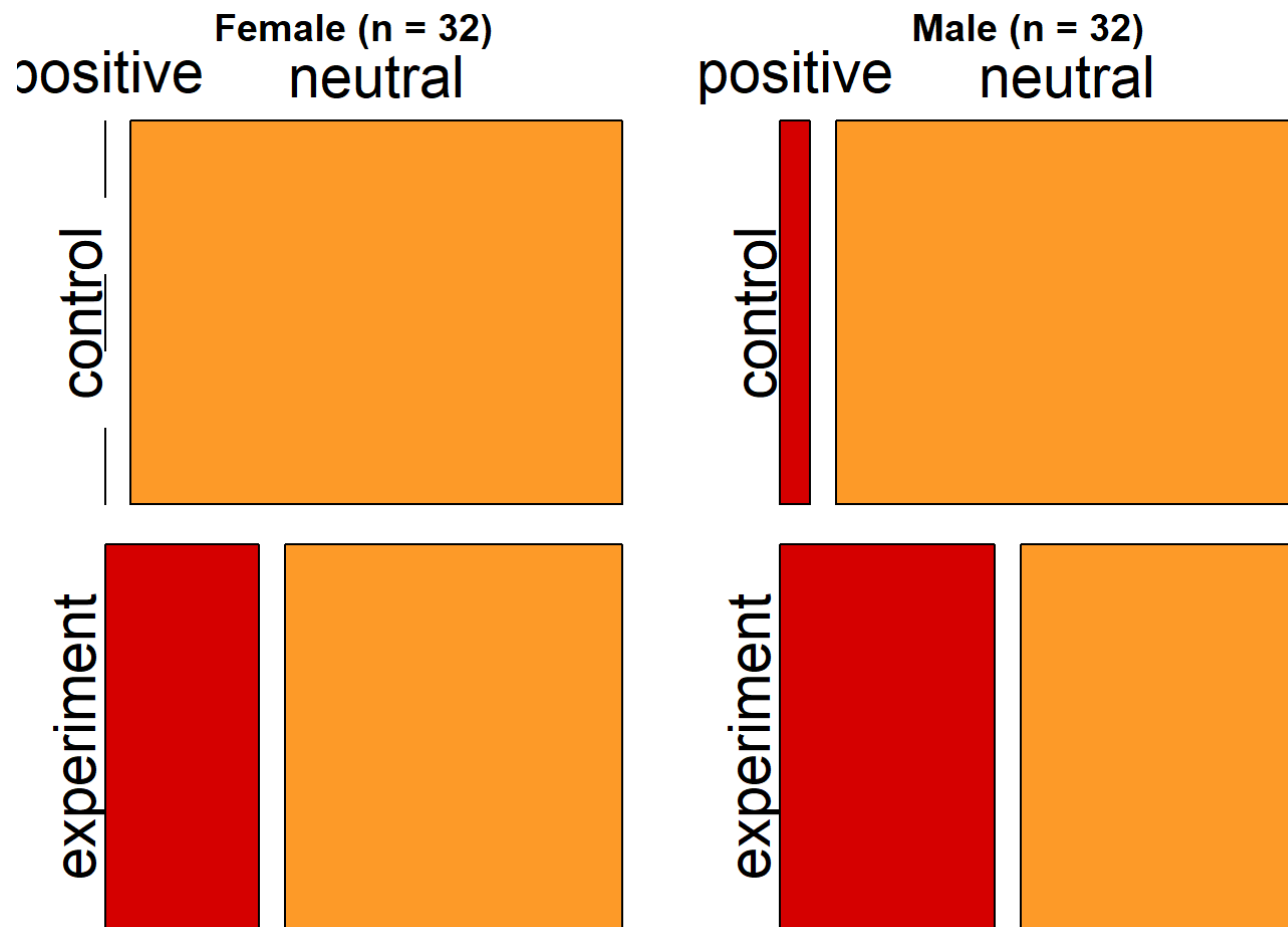

```
df3 <- read.csv("Drone-study-data.csv", header = T, row.names = 1, sep = ";")
```

```
# nest height
mean(df3$nest.height[df3$parasite == 0])
```

```
## [1] 13.75
```

```
sd(df3$nest.height[df3$parasite == 0])
```

```
## [1] 4.49603
```

```
(sd(df3$nest.height[df3$parasite == 0])  
)/mean(df3$nest.height[df3$parasite == 0])
```

```
## [1] 0.326984
```

```
median(df3$nest.height[df3$parasite == 0])
```

```
## [1] 12.5
```

```
c(min(df3$nest.height[df3$parasite == 0]), max(df3$nest.height[df3$parasite == 0]))
```

```
## [1] 10 24
```

```
mean(df3$nest.height[df3$parasite == 1])
```

```
## [1] 14.375
```

```
sd(df3$nest.height[df3$parasite == 1])
```

```
## [1] 2.615203
```

```
(sd(df3$nest.height[df3$parasite == 1])  
)/mean(df3$nest.height[df3$parasite == 1])
```

```
## [1] 0.1819272
```

```
median(df3$nest.height[df3$parasite == 1])
```

```
## [1] 14
```

```
c(min(df3$nest.height[df3$parasite == 1]),  
max(df3$nest.height[df3$parasite == 1]))
```

```
## [1] 12 20
```

```
wilcox.exact.default(df3$nest.height[df3$parasite == 0], df3$nest.height[df3$parasite == 1], alternative = "less"  
)
```

```
##  
## Exact Wilcoxon rank sum test  
##  
## data: df3$nest.height[df3$parasite == 0] and df3$nest.height[df3$parasite == 1]  
## W = 22.5, p-value = 0.1719  
## alternative hypothesis: true mu is less than 0
```

```
# nest width  
mean(df3$nest.width[df3$parasite == 0])
```

```
## [1] 10.375
```

```
sd(df3$nest.width[df3$parasite == 0])
```

```
## [1] 0.5175492
```

```
(sd(df3$nest.width[df3$parasite == 0])  
)/mean(df3$nest.width[df3$parasite == 0])
```

```
## [1] 0.04988426
```

```
median(df3$nest.width[df3$parasite == 0])
```

```
## [1] 10
```

```
c(min(df3$nest.width[df3$parasite == 0]), max(df3$nest.width[df3$parasite == 0]))
```

```
## [1] 10 11
```

```
mean(df3$nest.width[df3$parasite == 1])
```

```
## [1] 10.375
```

```
sd(df3$nest.width[df3$parasite == 1])
```

```
## [1] 1.06066
```

```
(sd(df3$nest.width[df3$parasite == 1])  
)/mean(df3$nest.width[df3$parasite == 1])
```

```
## [1] 0.1022323
```

```
median(df3$nest.width[df3$parasite == 1])
```



```
## [1] 10.5
```

```
c(min(df3$nest.width[df3$parasite == 1]),  
max(df3$nest.width[df3$parasite == 1]))
```

```
## [1] 9 12
```

```
wilcox.exact.default(df3$nest.width[df3$parasite == 0], df3$nest.width[df3$parasite == 1], alternative = "less")
```

```
##  
## Exact Wilcoxon rank sum test  
##  
## data: df3$nest.width[df3$parasite == 0] and df3$nest.width[df3$parasite == 1]  
## W = 31.5, p-value = 0.5  
## alternative hypothesis: true mu is less than 0
```

```
# nest volume
```

```
df3$nest.volume <- 3.14 * df3$nest.height * ((df3$nest.width/2)^2)  
df3$nest.volume
```

```
## [1] 785.000 1020.500 1899.700 1234.805 2279.640 1099.000 763.020  
## [8] 953.775 1695.600 942.000 1139.820 785.000 942.000 1424.775  
## [15] 1424.775 1020.500
```

```
mean(df3$nest.volume[df3$parasite == 0])
```

```
## [1] 1184.467
```

```
sd(df3$nest.volume[df3$parasite == 0])
```

```
## [1] 488.6239
```

```
(sd(df3$nest.volume[df3$parasite == 0])  
)/mean(df3$nest.volume[df3$parasite == 0])
```

```
## [1] 0.4125264
```

```
median(df3$nest.volume[df3$parasite == 0])
```

```
## [1] 1059.75
```

```
c(min(df3$nest.volume[df3$parasite == 0]), max(df3$nest.volume[df3$parasite == 0]))
```

```
## [1] 785.00 2279.64
```

```
mean(df3$nest.volume[df3$parasite == 1])
```

```
## [1] 1241.772
```

```
sd(df3$nest.volume[df3$parasite == 1])
```

```
## [1] 400.5956
```

```
(sd(df3$nest.volume[df3$parasite == 1])  
)/mean(df3$nest.volume[df3$parasite == 1])
```

```
## [1] 0.3226
```

```
median(df3$nest.volume[df3$parasite == 1])
```

```
## [1] 1127.653
```

```
c(min(df3$nest.volume[df3$parasite == 1]),  
max(df3$nest.volume[df3$parasite == 1]))
```

```
## [1] 763.02 1899.70
```

```
wilcox.exact.default(df3$nest.volume[df3$parasite == 0], df3$nest.volume[df3$parasite == 1], alternative = "less"  
)
```

```
##  
## Exact Wilcoxon rank sum test  
##  
## data: df3$nest.volume[df3$parasite == 0] and df3$nest.volume[df3$parasite == 1]  
## W = 28.5, p-value = 0.3706  
## alternative hypothesis: true mu is less than 0
```

```
# nest distance from water  
mean(df3$dist.water[df3$parasite == 0])
```

```
## [1] 70
```

```
sd(df3$dist.water[df3$parasite == 0])
```

```
## [1] 20.35401
```

```
sd(df3$dist.water[df3$parasite == 0])/
mean(df3$dist.water[df3$parasite == 0])
```

```
## [1] 0.2907716
```

```
median(df3$dist.water[df3$parasite == 0])
```

```
## [1] 62.5
```

```
c(min(df3$dist.water[df3$parasite == 0]), max(df3$dist.water[df3$parasite == 0]))
```

```
## [1] 50 110
```

```
mean(df3$dist.water[df3$parasite == 1])
```

```
## [1] 78.125
```

```
sd(df3$dist.water[df3$parasite == 1])
```

```
## [1] 26.98379
```

```
sd(df3$dist.water[df3$parasite == 1])/
mean(df3$dist.water[df3$parasite == 1])
```

```
## [1] 0.3453925
```

```
median(df3$dist.water[df3$parasite == 1])
```

```
## [1] 80
```

```
c(min(df3$dist.water[df3$parasite == 1]), max(df3$dist.water[df3$parasite == 1]))
```

```
## [1] 40 115
```

```
wilcox.exact.default(df3$dist.water[df3$parasite == 0], df3$dist.water[df3$parasite == 1], alternative = "greater")
```

```
##  
## Exact Wilcoxon rank sum test  
##  
## data: df3$dist.water[df3$parasite == 0] and df3$dist.water[df3$parasite == 1]  
## W = 26, p-value = 0.7399  
## alternative hypothesis: true mu is greater than 0
```

```
# distance from bank  
mean(df3$dist.bank[df3$parasite == 0])
```

```
## [1] 238.75
```

```
sd(df3$dist.bank[df3$parasite == 0])
```

```
## [1] 72.19765
```

```
sd(df3$dist.bank[df3$parasite == 0])/  
mean(df3$dist.bank[df3$parasite == 0])
```

```
## [1] 0.3023985
```

```
median(df3$dist.bank[df3$parasite == 0])
```

```
## [1] 245
```

```
c(min(df3$dist.bank[df3$parasite == 0]), max(df3$dist.bank[df3$parasite == 0]))
```

```
## [1] 100 320
```

```
mean(df3$dist.bank[df3$parasite == 1])
```

```
## [1] 178.125
```

```
sd(df3$dist.bank[df3$parasite == 1])
```

```
## [1] 39.27354
```

```
sd(df3$dist.bank[df3$parasite == 1])/  
mean(df3$dist.bank[df3$parasite == 1])
```

```
## [1] 0.220483
```

```
median(df3$dist.bank[df3$parasite == 1])
```

```
## [1] 170
```

```
c(min(df3$dist.bank[df3$parasite == 1]), max(df3$dist.bank[df3$parasite == 1]))
```

```
## [1] 125 240
```

```
wilcox.exact.default(df3$dist.bank[df3$parasite == 0], df3$dist.bank[df3$parasite == 1], alternative = "greater")
```

```
##  
## Exact Wilcoxon rank sum test  
##  
## data: df3$dist.bank[df3$parasite == 0] and df3$dist.bank[df3$parasite == 1]  
## W = 50.5, p-value = 0.02525  
## alternative hypothesis: true mu is greater than 0
```

```
# nest height above water  
mean(df3$above.water[df3$parasite == 0])
```

```
## [1] 82.875
```

```
sd(df3$above.water[df3$parasite == 0])
```

```
## [1] 29.12259
```

```
sd(df3$above.water[df3$parasite == 0])/  
mean(df3$above.water[df3$parasite == 0])
```

```
## [1] 0.3514037
```

```
median(df3$above.water[df3$parasite == 0])
```

```
## [1] 83.5
```

```
c(min(df3$above.water[df3$parasite == 0]), max(df3$above.water[df3$parasite == 0]))
```

```
## [1] 40 120
```

```
mean(df3$above.water[df3$parasite == 1])
```

```
## [1] 79.625
```

```
sd(df3$above.water[df3$parasite == 1])
```

```
## [1] 25.76231
```

```
sd(df3$above.water[df3$parasite == 1])/  
mean(df3$above.water[df3$parasite == 1])
```

```
## [1] 0.3235454
```

```
median(df3$above.water[df3$parasite == 1])
```

```
## [1] 82.5
```

```
c(min(df3$above.water[df3$parasite == 1]), max(df3$above.water[df3$parasite == 1]))
```

```
## [1] 42 118
```

```
wilcox.exact.default(df3$above.water[df3$parasite == 0], df3$above.water[df3$parasite == 1], alternative = "less"  
)
```



```
##  
## Exact Wilcoxon rank sum test  
##  
## data: df3$above.water[df3$parasite == 0] and df3$above.water[df3$parasite == 1]  
## W = 33.5, p-value = 0.5712  
## alternative hypothesis: true mu is less than 0
```

```
# vegetation height above water  
mean(df3$above.nest[df3$parasite == 0])
```

```
## [1] 178.75
```

```
sd(df3$above.nest[df3$parasite == 0])
```

```
## [1] 25.31939
```

```
sd(df3$above.nest[df3$parasite == 0])/  
mean(df3$above.nest[df3$parasite == 0])
```

```
## [1] 0.1416469
```

```
median(df3$above.nest[df3$parasite == 0])
```

```
## [1] 190
```

```
c(min(df3$above.nest[df3$parasite == 0]), max(df3$above.nest[df3$parasite == 0]))
```

```
## [1] 140 200
```

```
mean(df3$above.nest[df3$parasite == 1])
```

```
## [1] 200
```

```
sd(df3$above.nest[df3$parasite == 1])
```

```
## [1] 45.66962
```

```
sd(df3$above.nest[df3$parasite == 1])/  
mean(df3$above.nest[df3$parasite == 1])
```

```
## [1] 0.2283481
```

```
median(df3$above.nest[df3$parasite == 1])
```

```
## [1] 200
```

```
c(min(df3$above.nest[df3$parasite == 1]), max(df3$above.nest[df3$parasite == 1]))
```

```
## [1] 140 280
```

```
wilcox.exact.default(df3$above.nest[df3$parasite == 0], df3$above.nest[df3$parasite == 1], alternative = "greater")
```

```
##  
## Exact Wilcoxon rank sum test  
##  
## data: df3$above.nest[df3$parasite == 0] and df3$above.nest[df3$parasite == 1]
```

```
## W = 22.5, p-value = 0.8532
## alternative hypothesis: true mu is greater than 0
```

```
# distance from closest perch
mean(df3$perch.dist[df3$parasite == 0])
```

```
## [1] 11.75
```

```
sd(df3$perch.dist[df3$parasite == 0])
```

```
## [1] 5.574175
```

```
sd(df3$perch.dist[df3$parasite == 0])/
mean(df3$perch.dist[df3$parasite == 0])
```

```
## [1] 0.4743979
```

```
median(df3$perch.dist[df3$parasite == 0])
```

```
## [1] 12
```

```
c(min(df3$perch.dist[df3$parasite == 0]), max(df3$perch.dist[df3$parasite == 0]))
```

```
## [1] 3 20
```

```
mean(df3$perch.dist[df3$parasite == 1])
```

```
## [1] 10.75
```

```
sd(df3$perch.dist[df3$parasite == 1])
```

```
## [1] 6.923046
```

```
sd(df3$perch.dist[df3$parasite == 1])/  
mean(df3$perch.dist[df3$parasite == 1])
```

```
## [1] 0.6440043
```

```
median(df3$perch.dist[df3$parasite == 1])
```

```
## [1] 8
```

```
c(min(df3$perch.dist[df3$parasite == 1]), max(df3$perch.dist[df3$parasite == 1]))
```

```
## [1] 5 25
```

```
wilcox.exact.default(df3$perch.dist[df3$parasite == 0], df3$perch.dist[df3$parasite == 1], alternative = "less")
```

```
##  
## Exact Wilcoxon rank sum test  
##  
## data: df3$perch.dist[df3$parasite == 0] and df3$perch.dist[df3$parasite == 1]  
## W = 36.5, p-value = 0.6886  
## alternative hypothesis: true mu is less than 0
```

```
#nest visibility  
nv <- t(matrix(c(4,5,3,3,1,0), nrow = 3, byrow = T, dimnames = list( c("direct nest view", "indirect nest view",
```

```
"no nest view"), c("unparasited", "parasited"))))  
fisher.test(nv, alternative = "less")
```

```
##  
## Fisher's Exact Test for Count Data  
##  
## data:  nv  
## p-value = 1  
## alternative hypothesis: less
```
